# Supplementary material
Source: Springer Nature journal article supplement (https://www.springermedizin.de/resource/supplementary/12948_2010_78_MOESM3_ESM.pdf/9557182)

IgG<sub>1</sub>

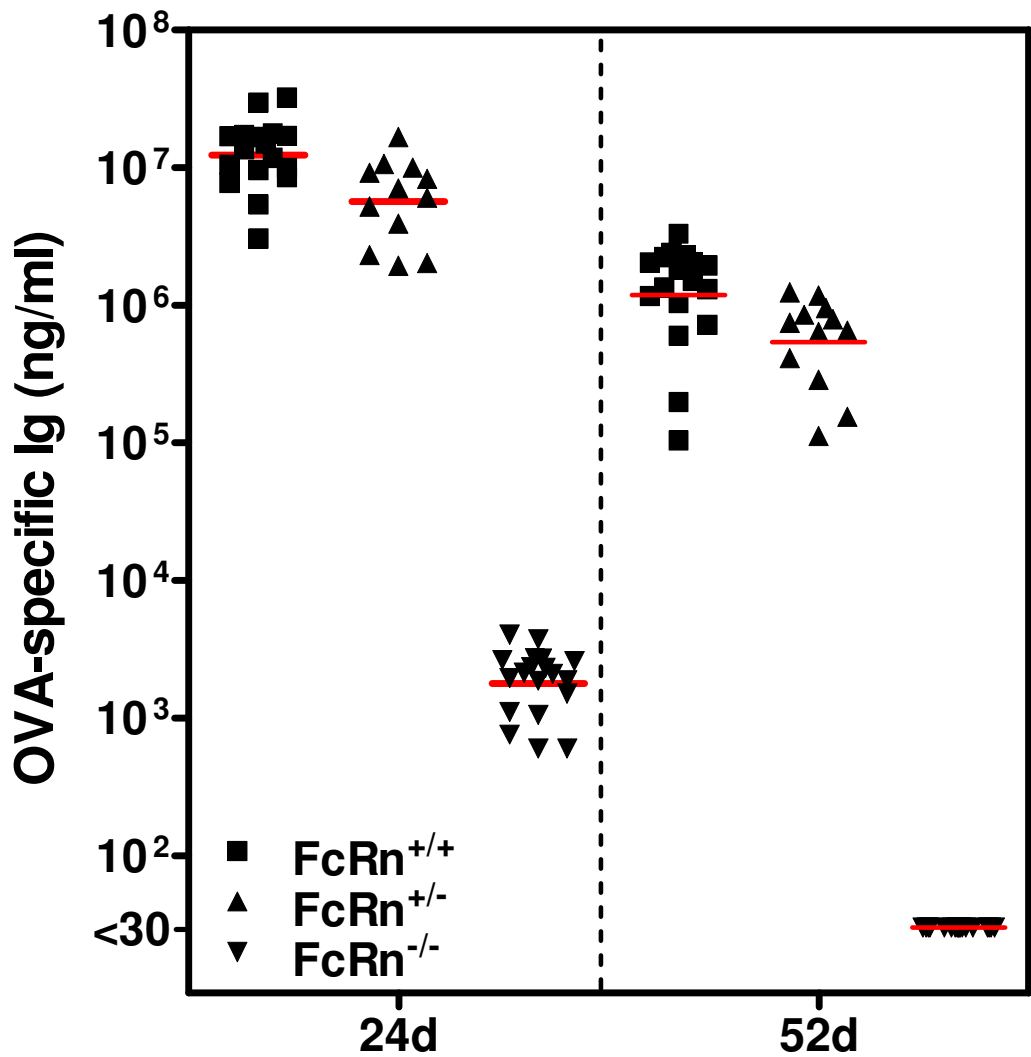

Supplement: MOESM3 [file 9557182]
